# Supplementary material
Source: PubMed Central journal article supplement (PMC9718507)
Supplement: NIHMS1848794-supplement-supplementary_all.pdf [file NIHMS1848794-supplement-supplementary_all.pdf]

**Immunity, Volume 55**

**Supplemental information**

**DNA methyltransferase 3 alpha and TET  
methylcytosine dioxygenase 2 restrain  
mitochondrial DNA-mediated interferon  
signaling in macrophages**

**Isidoro Cobo, Tiffany N. Tanaka, Kailash Chandra Mangalhari, Addison Lana, Calvin Yeang, Claudia Han, Johannes Schlachetzki, Jean Chalcombe, Bethany R. Fixsen, Mashito Sakai, Rick Z. Li, Hannah Fields, Michal Mokry, Randy G. Tsai, Rafael Bejar, Koen Prange, Menno de Winther, Gerald S. Shadel, and Christopher K. Glass**

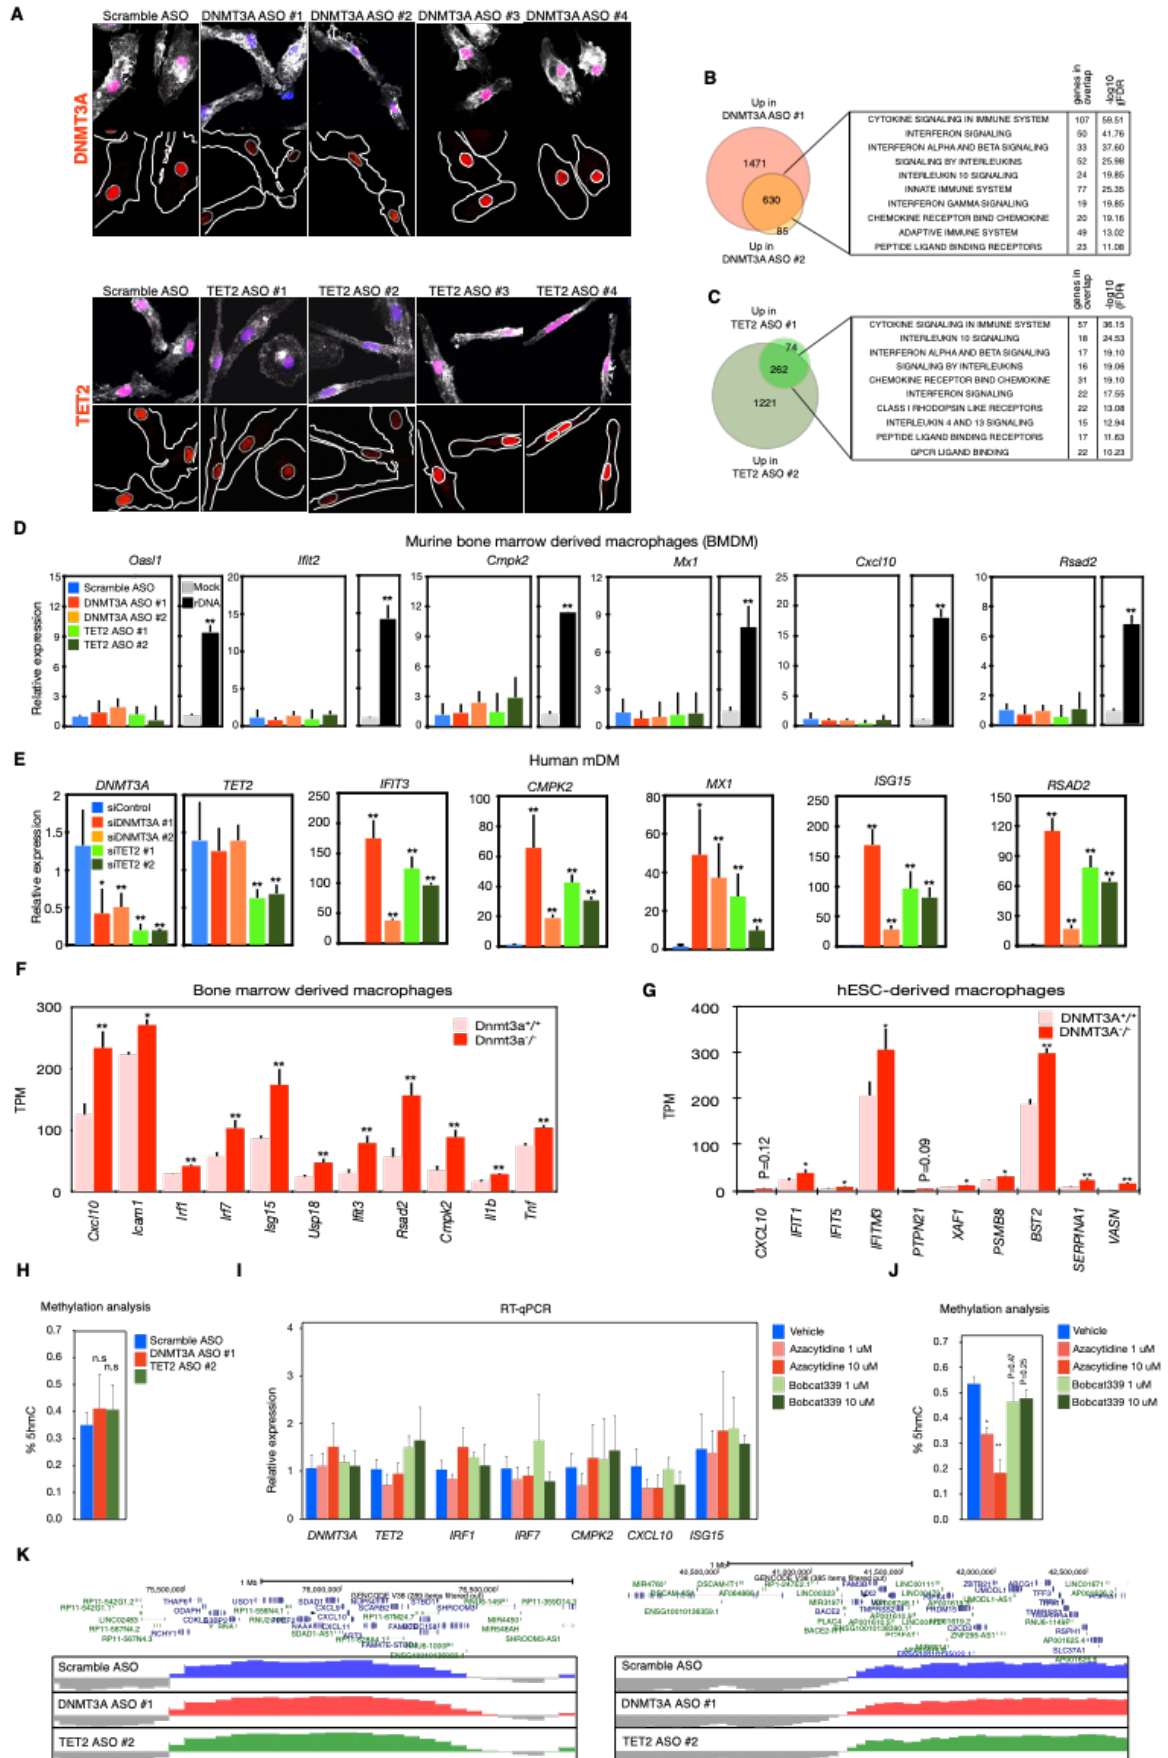

Figure S1

**Figure S1-related to Figure 1 and Figure 2. DNMT3A or TET2 loss of expression leads to up-regulation of interferon signalling.**

- A) Protein quantification by IF. Scale bars= 5  $\mu$ m.
- B) Venn plot of the overlap between DEG in both DNMT3A ASOs
- C) Venn plot of the overlap between DEG in both TET2 ASOs.
- D) RT-qPCR of ISGs in BMDM treated with recombinant DNA and with human specific ASOs (n=3).
- E) RT-qPCR of *DNMT3A*, *TET2* and ISG in mDM incubated with siRNAs (n=3 donors).
- F) Bar plot of ISG in BMDM from *Dnmt3a*<sup>-/-</sup> vs. *Dnmt3a*<sup>+/+</sup> mice.
- G) Bar plot showing of ISG in *DNMT3A*<sup>-/-</sup> vs. *DNMT3A*<sup>+/+</sup> iPSC-derived macrophages.
- H) Bar graphs of global 5-hydroxymethyl-cytosine analysis in Scramble ASO, DNMT3A ASO #1 or TET2 ASO #2 (n=3 donors).
- I) Bar graphs of expression analysis by RT-qPCR of *CXCL10*, *IRF7*, *MX1*, *IFIT1*, *IFIT2* and *CMPK2* in mDM treated with 1uM or 10uM of 5'-azacytidine or Bobcat339 for 24h in mDM (n=3 donors).
- J) Bar graphs of global methylation analysis in mDM treated with 5'-azacytidine but not Bobcat339 (n=3 donors).
- K) Composites of HiC values of PC1 in genomic regions around the *CXCL10* (left) or *MX1* (right) locus in mDM treated with DNMT3A ASO #1 or TET2 ASO #2 vs. Scramble ASO. (n=1 pool of three donors).

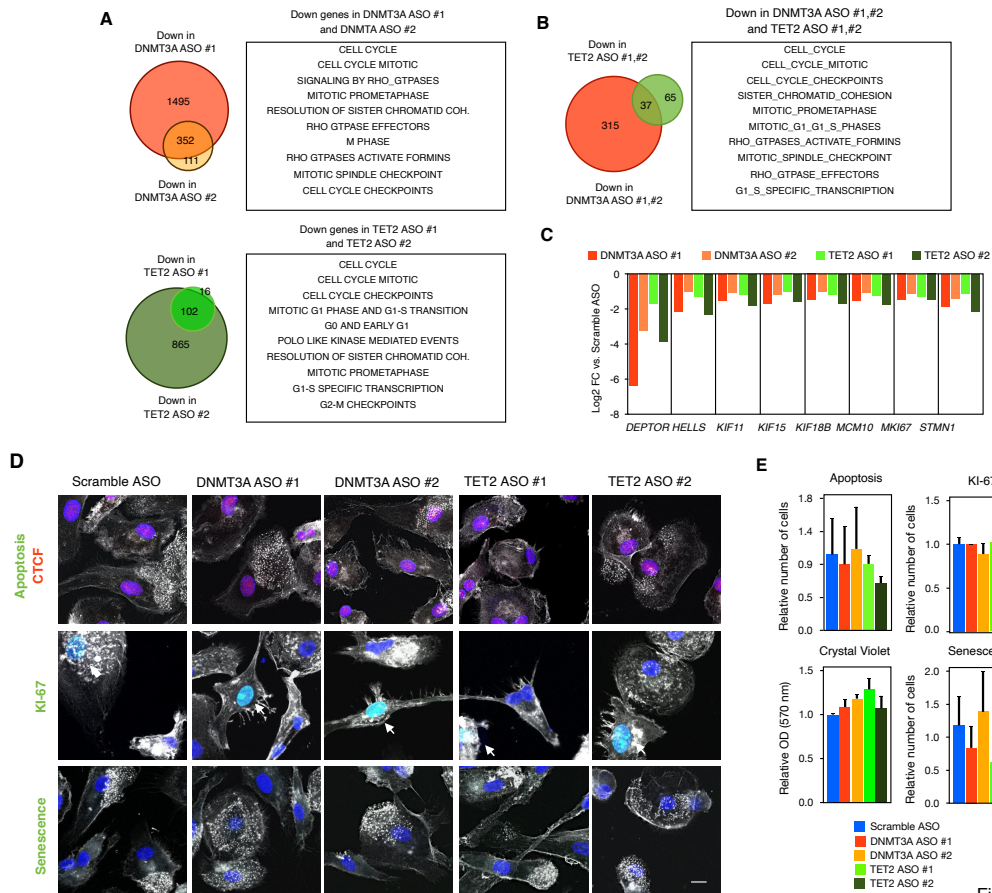

Figure S2

**Figure S2-related to Figure 1 and Figure 2. DNMT3A or TET2 loss of expression does not alter cell proliferation, apoptosis, or senescence in mDM but activates signaling by IFNA or TLR agonist.**

- Venn diagram of the overlap of down-regulated genes from DNMT3A ASOs #1 and #2 and enriched gene ontology terms.
- Venn diagram of the overlap of down-regulated genes from TET2 ASOs #1 and #2 and enriched gene ontology terms.
- RNA expression of regulators of cell cycle in mDM treated with both DNMT3A ASO and TET2 ASO.
- IF analysis of ApoTracker, CTCF, KI-67 and CellEvent (Senescence) in Scramble ASO, DNMT3A ASO or TET2 ASO in mDMs. Scale bars= 2 μm.
- Quantification by flow cytometry (ApoTracker, KI-67 and CellEvent) or by luminescence (crystal violet) of mDM treated with DNMT3A ASO or TET2 ASO (n≥4 donors)

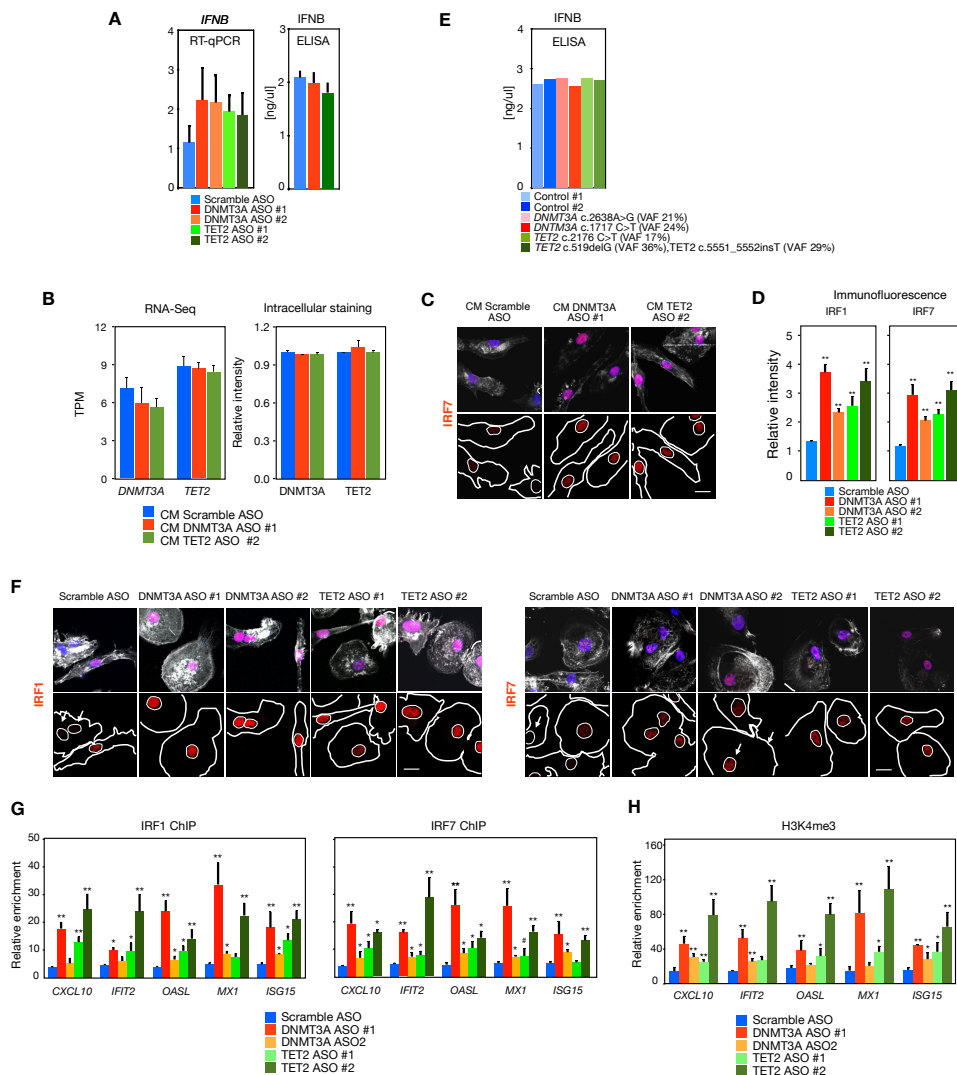

Figure S3

**Figure S3-related to Figure 2. Reduced DNMT3A or TET2 expression leads to increased IRF1 and IRF7 and changes in the histone landscape of ISGs.**

- (A) RT-qPCR (left) or protein secretion by ELISA (right) of IFN $\beta$  in mDM incubated with DNMT3A ASOs or TET2 ASOs ( $n \geq 3$ /donor)
- (B) Analysis of DNMT3A or TET2 mRNA (left) or protein (right) expression in macrophages incubated conditioned media from macrophages treated with DNMT3A ASO #1 or TET2 ASO #2 ( $n \geq 4$  donors)
- (C) Protein expression analysis of IRF7 by IF in macrophages incubated conditioned media from macrophages treated with DNMT3A ASO #1 or TET2 ASO #2 ( $n = 4$  donors). Scale bars = 5  $\mu$ m.
- (D) Protein expression by IF of IRF1 or IRF7 in macrophages with reduced DNMT3A or TET2 expression ( $n = 3$  donors).
- (E) Secretion analysis of IFN $\beta$  by ELISA in mDM control and those harbouring *DNMT3A* mutations or *TET2* mutations.
- (F) Immunofluorescence analysis of IRF1 and IRF7 in mDM incubated with DNMT3A ASO #1 or TET2 ASO #2. Scale bars = 5  $\mu$ m.

- (G)ChIP-qPCR of IRF1 and IRF7 over the promoter of *CXCL10*, *IFIT2*, *OASL*, *MX1* and *ISG15* in mm treated with DNMT3A ASO or TET2 ASO as compared to Scramble ASO (n=4 donors).
- (H)H3K4me3 ChIP-qPCR on the promoter of *CXCL10*, *IFIT2*, *OASL*, *MX1*, *ISG15* in macrophages with reduced DNMT3A ASOs or TET2 ASOs ~~expression~~ (n=4 donors).

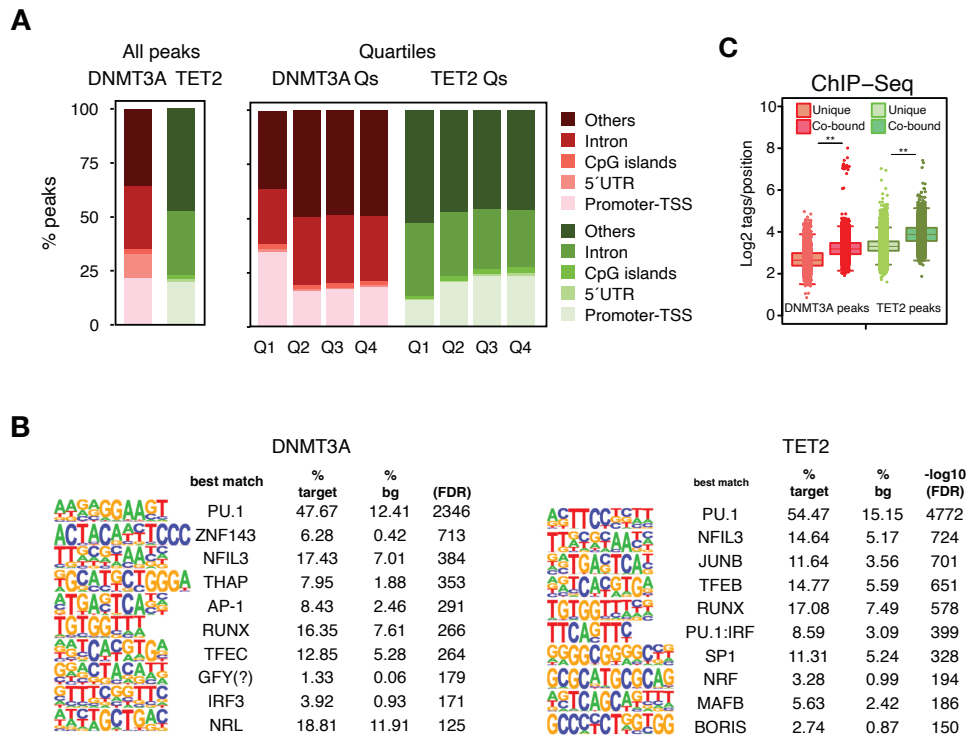

Figure S4

**Figure S4-related to Figure 4. DNMT3A and TET2 bind to genomic regions with enriched in PU.1, ZNF143, AP-1 and RUNX motifs.**

- (A) Bar graphs showing the peak distribution of the quartiles of intensity of DNMT3A or TET2 ChIP-Seq. Data show higher percentage of promoter-TSS peaks in of the top Q1 quartile of DNMT3A ChIP-Seq and in Q4 of TET2 ChIP-Seq peaks.
- (B) *De novo* motif analysis of peaks DNMT3A unique peaks, DNMT3A-TET2 cobound peaks or TET2 peaks (n=4 donors).
- (C) Boxplot showing the number of tags per position in DNMT3A or TET2 ChIP-Seq when analysed DNMT3A or TET2 unique peaks, or DNMT3A-TET2 cobound peaks (n=4 donors).

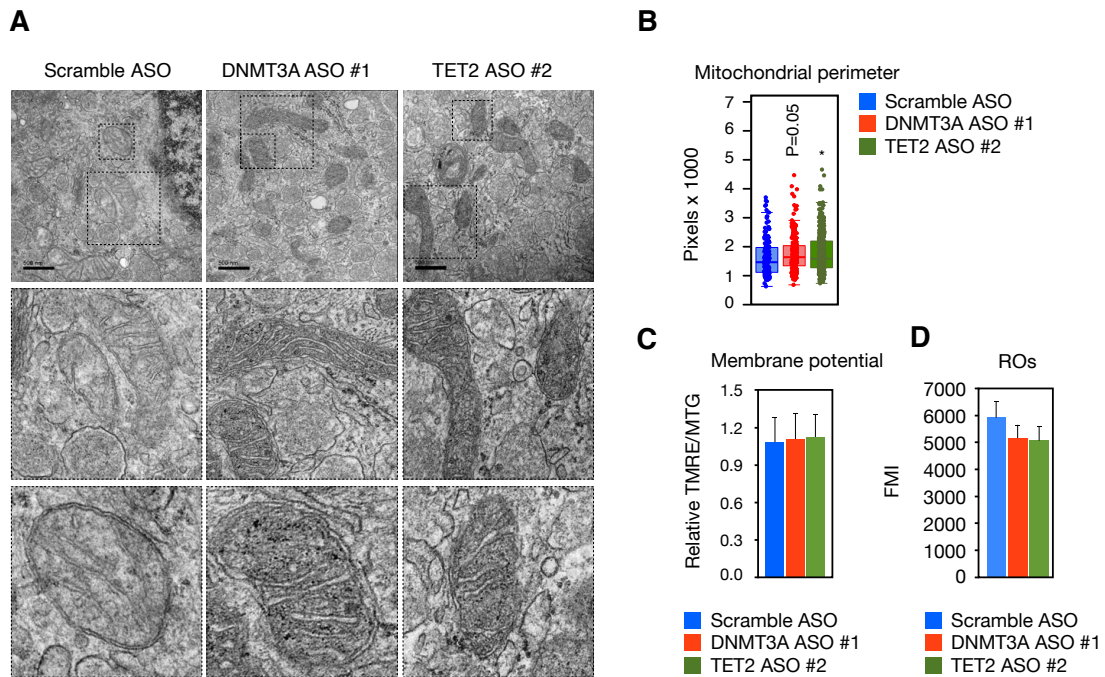

Figure S5

**Figure S5-related to Figure 5. Larger mitochondria are observed in macrophages with reduced DNMT3A or TET2 expression, but this does not affect mitochondrial function nor alter levels of reactive oxygen species.**

- (A) Transmission electron microscopy images of mDM treated with DNMT3A ASO and TET2 ASO (n=1 donor). Squares with broken lines denote magnification areas in images below. Scale bars denote 500 nm.
- (B) Quantification of mitochondria perimeter (n>100 mitochondria per condition)
- (C) Mitochondria membrane potential in DNMT3A or TET2 treated mDM (left) assessed by flow cytometry ratio of TMRE/MTG. Larger mitochondria is observed in DNMT3A ASO or TET2 ASO treated mDM
- (D) Levels of reactive oxygen species in DNMT3A ASO or TET2 ASO treated mDM (n≥4 donors)

Mann Whitney U-test was used to calculate statistical significance in all panels except in E where Student's T test was used. \* P<0.05; \*\* P<0.01.



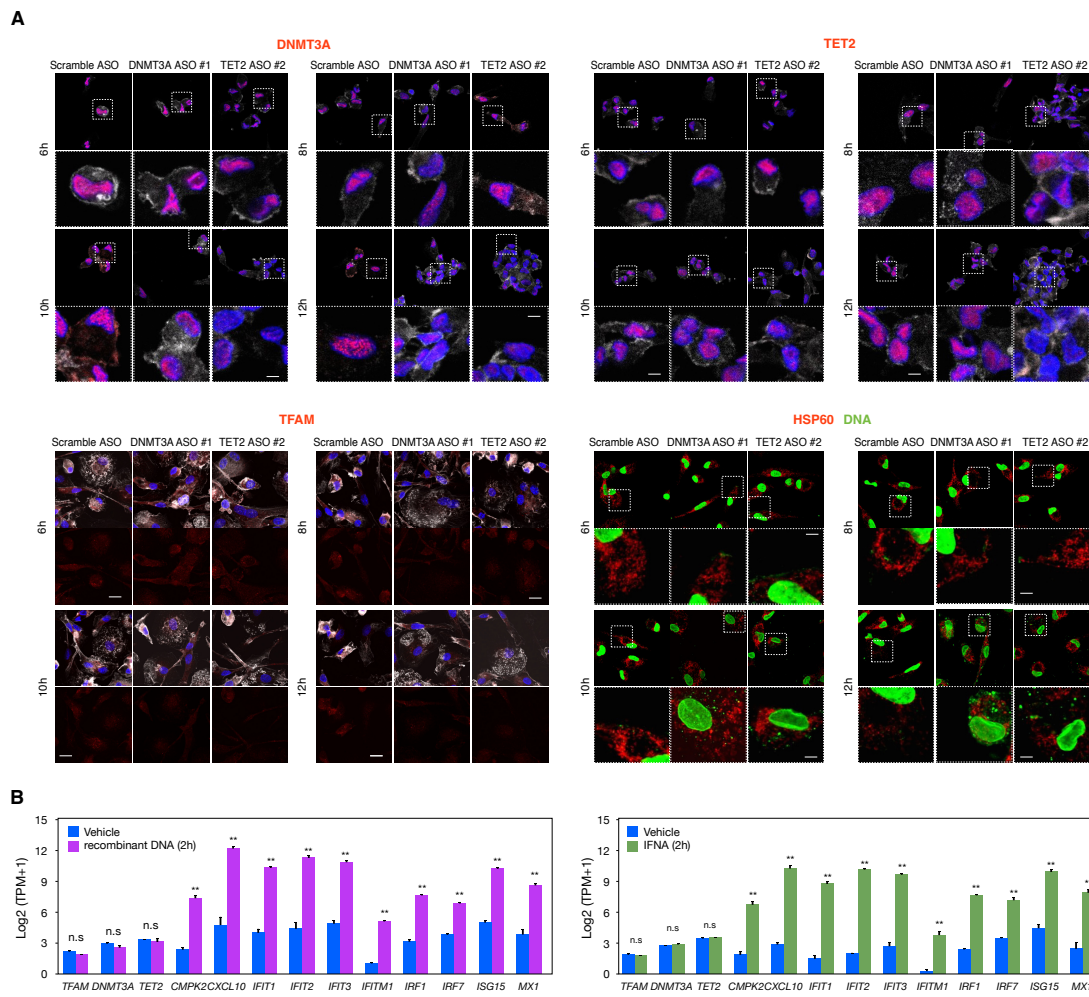

Figure SF6

**Figure S6-related to Figure 6. TFAM downregulation precedes the formation of cytosolic DNA.**

A) Protein analysis by IF of DNMT3A and TET2 at 8h whereas TFAM downregulation occurs at 10h and accumulation of cytosolic DNA occurs at 12h. Scale bars= 1  $\mu$ m.

B) Activation of ISG by recombinant DNA (left) or IFNA (right) assessed by RNA-Seq does not lead to lower expression of *DNMT3A*, *TET2* or *TFAM* (n=3 donors).

Mann Whitney U-test was used to calculate statistical significance. \* P<0.05; \*\* P<0.01.

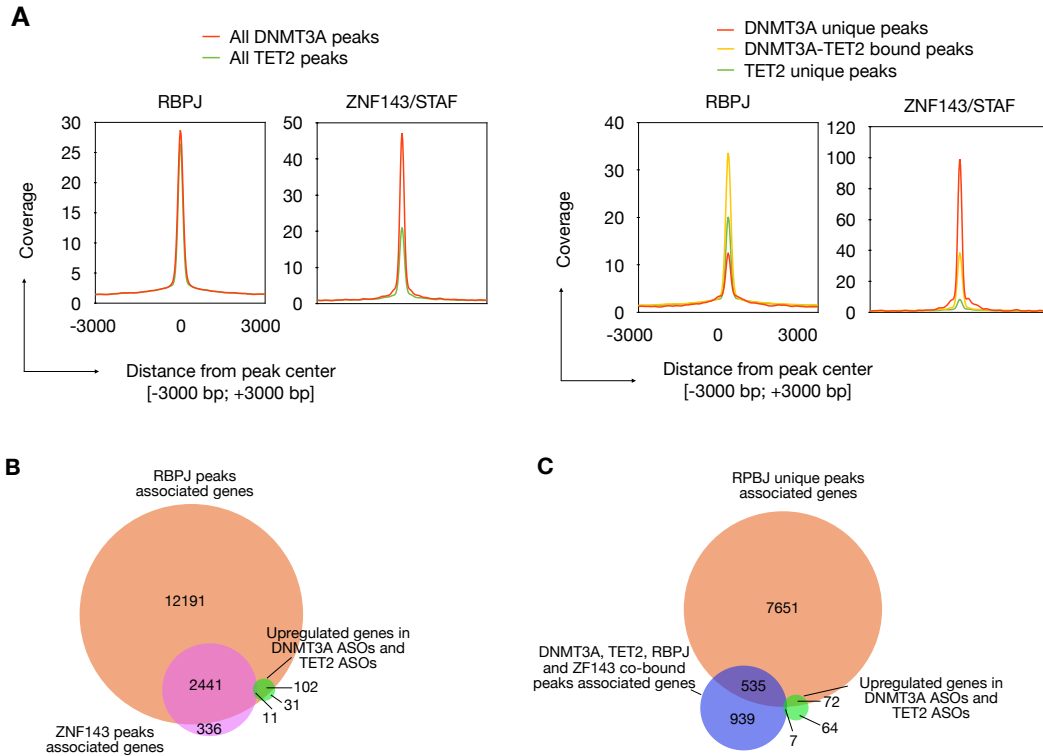

Supplementary Figure 7

**Figure S7-related to Figure 7. DNMT3A, TET2, RBPJ and ZNF143 are part of a collaborative network of transcription factors in mDM.**

- Histogram showing the enrichment in ZNF143 binding in DNMT3A peaks (left), in DNMT3A unique peaks (right) and the enrichment of RBPJ in peaks co-bound by DNMT3A and TET2 (right).
- Venn diagram showing the overlap between RBPJ peaks and ZNF143 peaks associated genes and the genes upregulated by DNMT3A ASO and TET2 ASOs.
- Venn diagram of upregulated genes by DNMT3A ASO and TET2 ASOs and RBPJ unique peaks.

|          | <b>Diagnosis</b> | <b>Age</b> | <b>Gender</b> | <b><i>DNMT3A</i></b>        | <b><i>TET2</i></b>                                              | <b>CVD</b> |
|----------|------------------|------------|---------------|-----------------------------|-----------------------------------------------------------------|------------|
| Sample 1 | Normal           | 79         | F             | No mutation                 | No mutation                                                     | No         |
| Sample 2 | Normal           | 70         | F             | No mutation                 | No mutation                                                     | No         |
| Sample 3 | CCUS             | 72         | F             | c.2638A>G, p.M880V, VAF 21% | No mutation                                                     | No         |
| Sample 4 | MDS              | 76         | F             | c.1717C>T, p.Q573*, VAF 24% | No mutation                                                     | No         |
| Sample 5 | CCUS             | 88         | M             | No mutation                 | c.2176C>T, p.Q726*, VAF 17%<br>c.519delG, p.P174Lfs*9, VAF 36%; | Yes        |
| Sample 6 | CCUS             | 69         | M             | No mutation                 | c.5551_5552insT, p.E1851Vfs*8, VAF 29%                          | Yes        |

**Table S1-related to Figure 2, 5. Demographics of patient samples used.** CVD denotes cardiovascular disease.
